# Supplementary material
Source: Research Square preprint supplement (doi:10.21203/rs.3.rs-10254471/v1)
Supplement: Supplementary file 1 [file 8971e0beb90ba39efb64cdc7.docx]

**Framework-stabilized multistage transition in antiferroelectric ceramics for high-energy storage**

Xing Zhao1, **†**, Yan Yan1, **†,** *, Xiaonan Kang1, **†**, Haoyu Wang1, Qing Li2, Yang Li3, Chao Sun4, Kun Yu1, Quan Li1, Leiyang Zhang3, Li Jin3, Jiwei Zhai4, Mao-Hua Zhang2 *, Gang Liu1 *, Ke Wang5

1 Southwest Mountain Regions Intelligent Agricultural Machinery Equipment Innovation Center, School of Materials and Energy, Southwest University, Chongqing, 400715, China

2 Wuzhen Laboratory, Jiaxing, 314500, China

3 Electronic Materials Research Laboratory, Key Laboratory of the Ministry of Education &International Center for Dielectric Research, School of Electronic Science and Engineering, Xi’an Jiaotong University, Xi’an, 710049, China

4 Key Laboratory of Advanced Civil Engineering Materials of Ministry of Education, Functional Materials Research Laboratory, School of Materials Science and Engineering, Tongji University, Shanghai, 201804, China

5 State Key Laboratory of New Ceramics and Fine Processing, School of Materials Science and Engineering, Tsinghua University, Beijing,100084, China

*Corresponding author to yanyan2013@swu.edu.cn (Y. Y.); zhangmh@wuzhenlab.com (M. H.)

liugang13@swu.edu.cn (G. L.)

**†** These authors contributed equally to this work

**Finite Simulation**

To investigate the dielectric breakdown behavior of ceramics, finite-element simulations were performed using COMSOL Multiphysics to resolve the electric potential distribution and the dynamic evolution of electrical treeing. A two‑dimensional simulation domain was reconstructed directly from representative SEM images, in which the selected region reflects the average grain morphology of the ceramic. The extracted microstructure was scaled to a width-to-height ratio of 3:4 and further processed using CAD software to ensure geometric fidelity for numerical implementation. Under an applied electric field, electrical tree branches preferentially nucleate at regions of enhanced local electric-field intensity, typically associated with geometric singularities, and subsequently propagate along grain boundaries and domain interfaces. Progressive growth of these conductive paths toward the opposite electrode ultimately signifies dielectric breakdown of the ceramic. To quantitatively evaluate the degree of breakdown damage, a scalar damage factor, *η*, ranging from 0 to 1 was introduced. Here, *η* = 1 corresponds to an intact, undamaged state, whereas *η* = 0 represents complete dielectric failure. The governing equations describing the electrostatic field and damage evolution are provided in Equations (1)-(4):

Among them, *ε*g​ and *ε*gb​ represent the dielectric constants of the grains and grain boundaries, respectively, as determined from the initial-state dielectric temperature spectrum; *k* = 0.01; *u* = 0.001; *f*(*η*)=4*η*3-3*η*4; *Γ* is associated with the breakdown energy, with a predefined ratio of *Γ*g : *Γ*gb = 1/10. The mobility parameter *m* governs the propagation speed of the breakdown process, while *L*, known as the regularization length, determines the width of the transition region between fully damaged and undamaged states in the phase-field order parameter. In the breakdown simulation, quadratic Lagrange interpolation is applied to the electric potential *ϕ*(*x*,*t*), while linear Lagrange interpolation is used for the damage parameter *η*(x,t). By controlling the evolution of time *t*, the dynamic behavior of the externally applied electric field is effectively introduced.





**Supplementary Fig. 1 Bipolar hysteresis loop of a** ZS0, **b** ZS15, **c** ZS30, **d** ZS35, **e** ZS40 and **f** ZS45 at room temperature.





**Supplementary Fig. 2 Differential of PL(ZS)*x*T *P* with respect to *E* as a function of electric field. a** ZS15**, b** ZS30**, c** ZS35and **d** ZS40**.**





**Supplementary Fig. 3 The unipolar polarization hysteresis loops of ZS0.** Evolution of unipolar *P-E* loop of ZS0 under 18 kV cm-1, 24 kV cm-1, 32 kV cm-1, and 34 kV cm‑1 electric field.





**Supplementary Fig. 4** Rietveld refinement of the high-energy XRD pattern of the ZS0 sample using the *Pbam* structural model. **a** Full pattern, magnified views of **b** representative superlattice reflections and **c-d** high-angle main reflections.





**Supplementary Fig. 5** Rietveld refinement of the high-energy XRD pattern of the ZS45 sample using the *Pbam* structural model. **a** Full pattern, magnified views of **b** representative superlattice reflections and **c-d** high-angle main reflections.


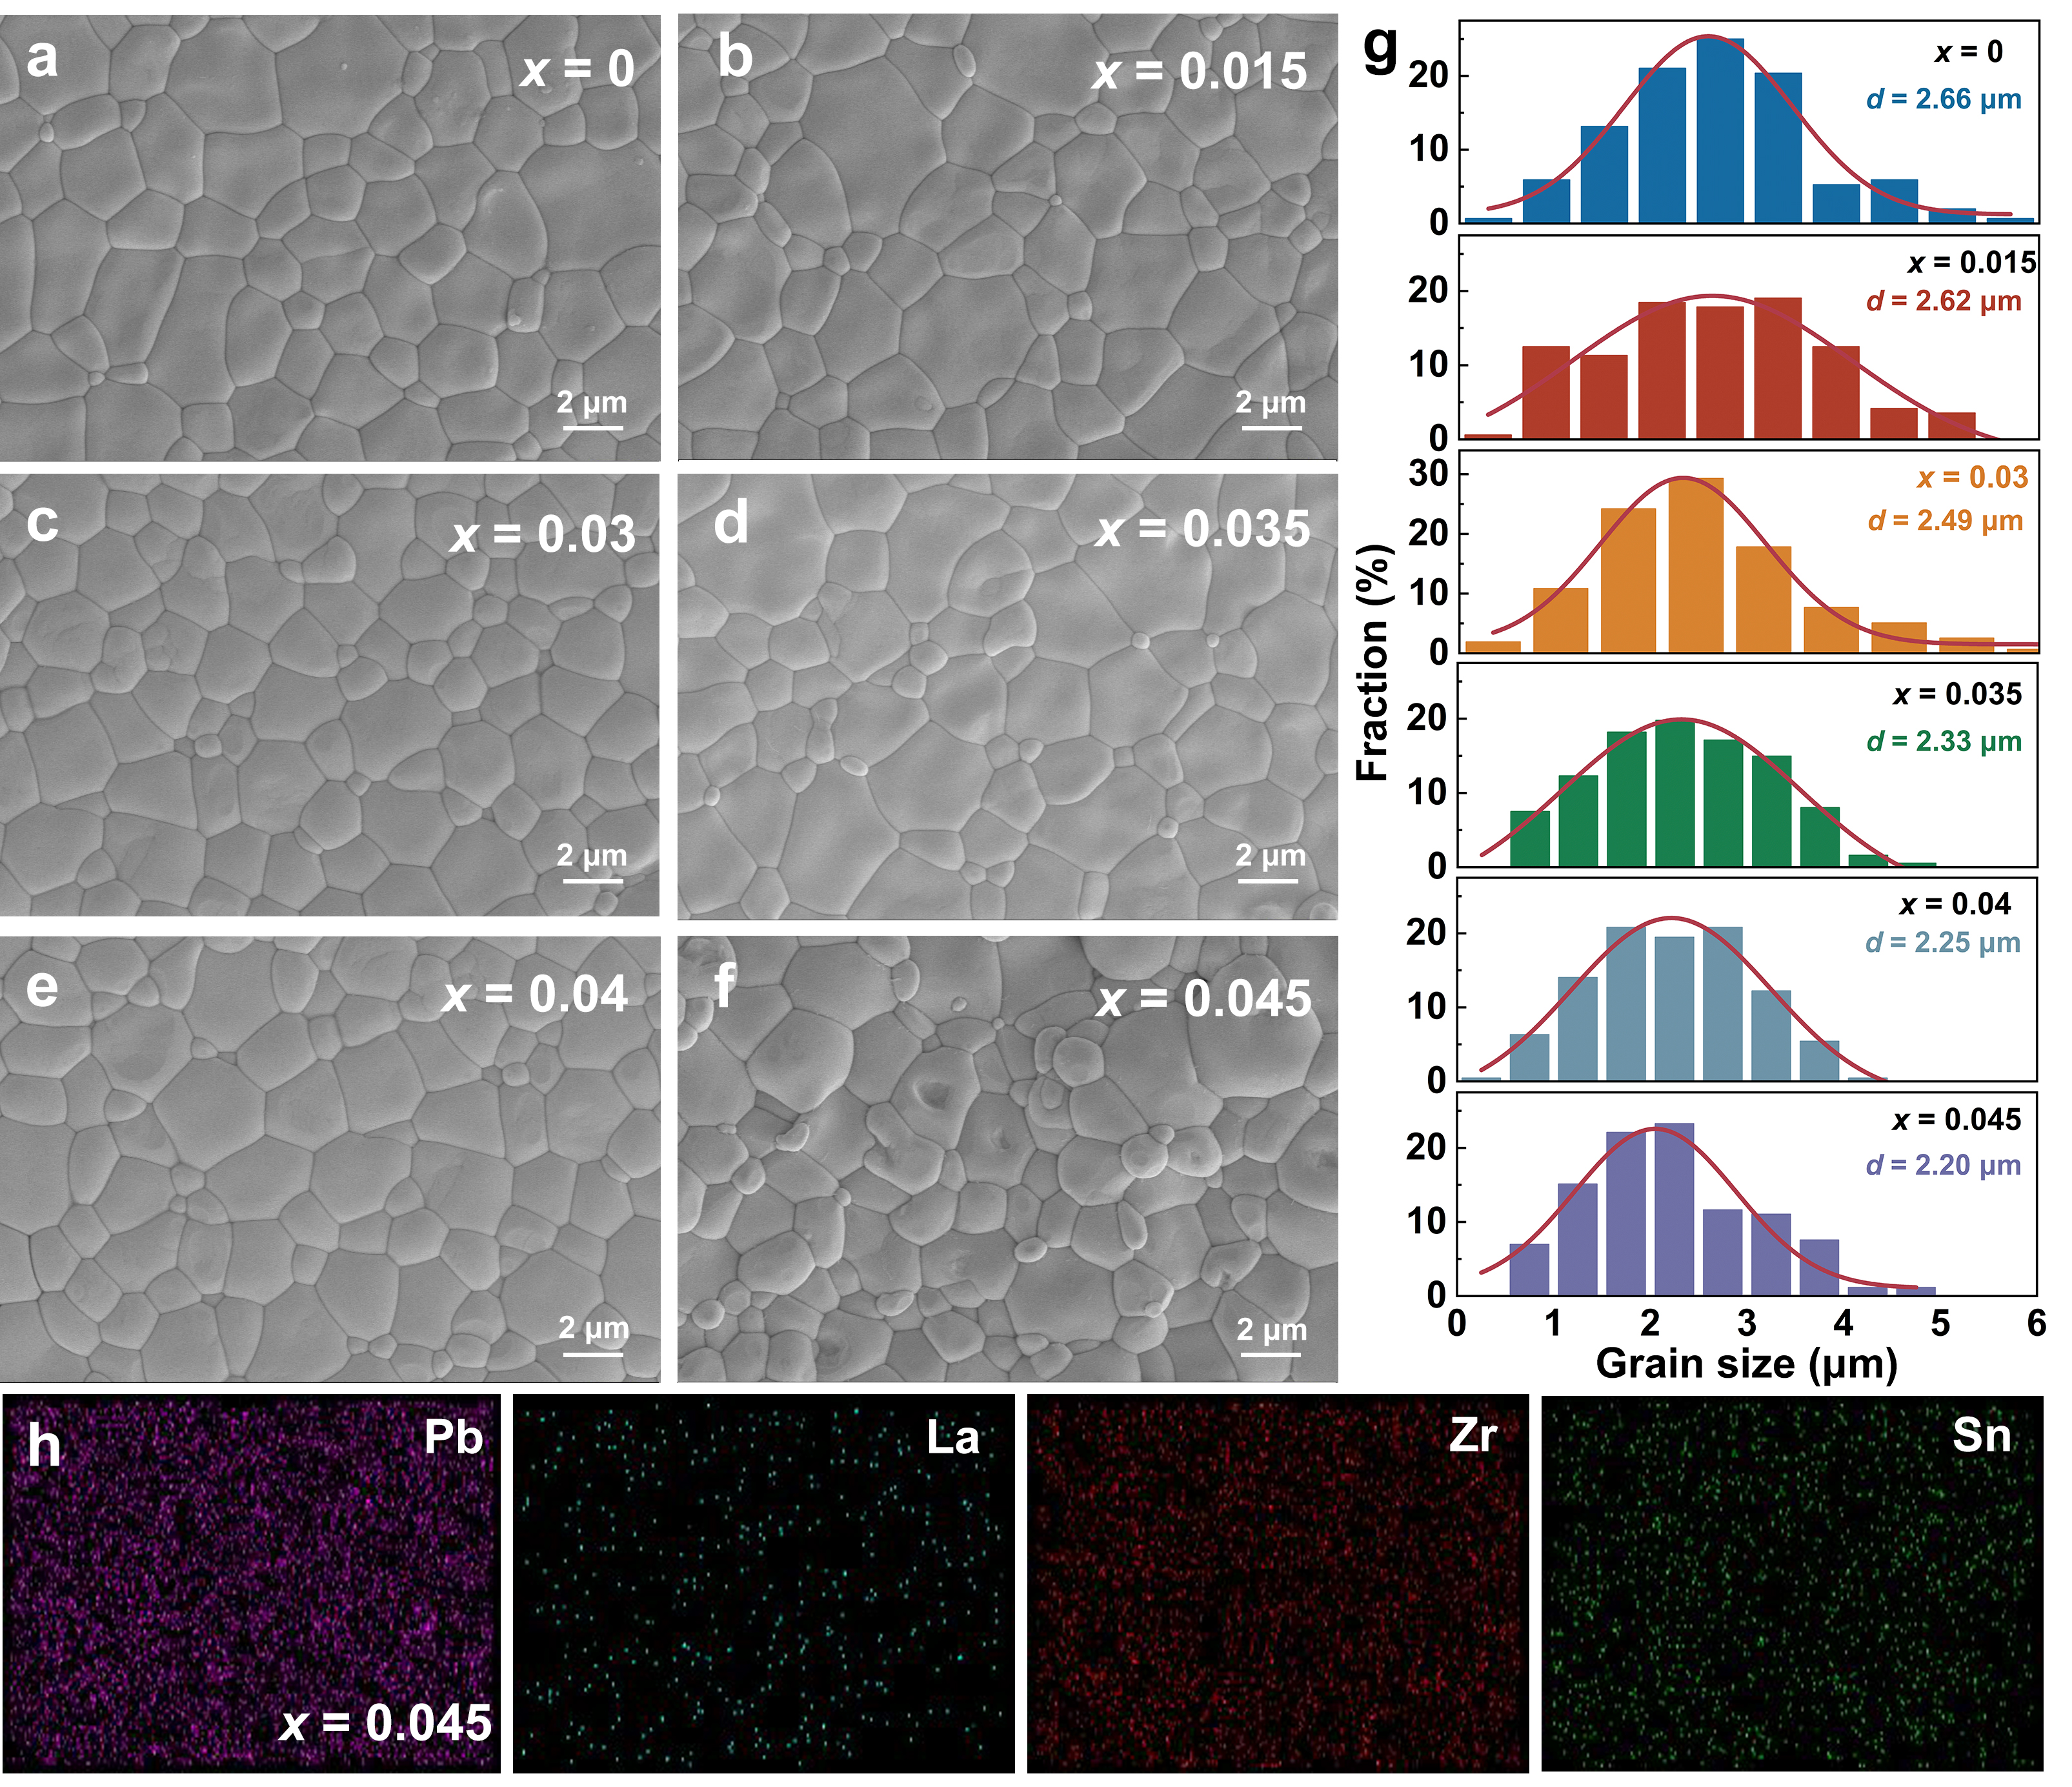


**Supplementary Fig. 6 SEM morphology, grain size statistics and element distribution maps of PL(ZS)*x*T ceramics.** SEM morphology of **a** ZS0, **b** ZS15, **c** ZS30, **d** ZS35, **e** ZS40, and **f** ZS45 ceramics. **g** Grain size statistics of ZS0-45 ceramics. **h** Element distribution maps of ZS45 ceramics.


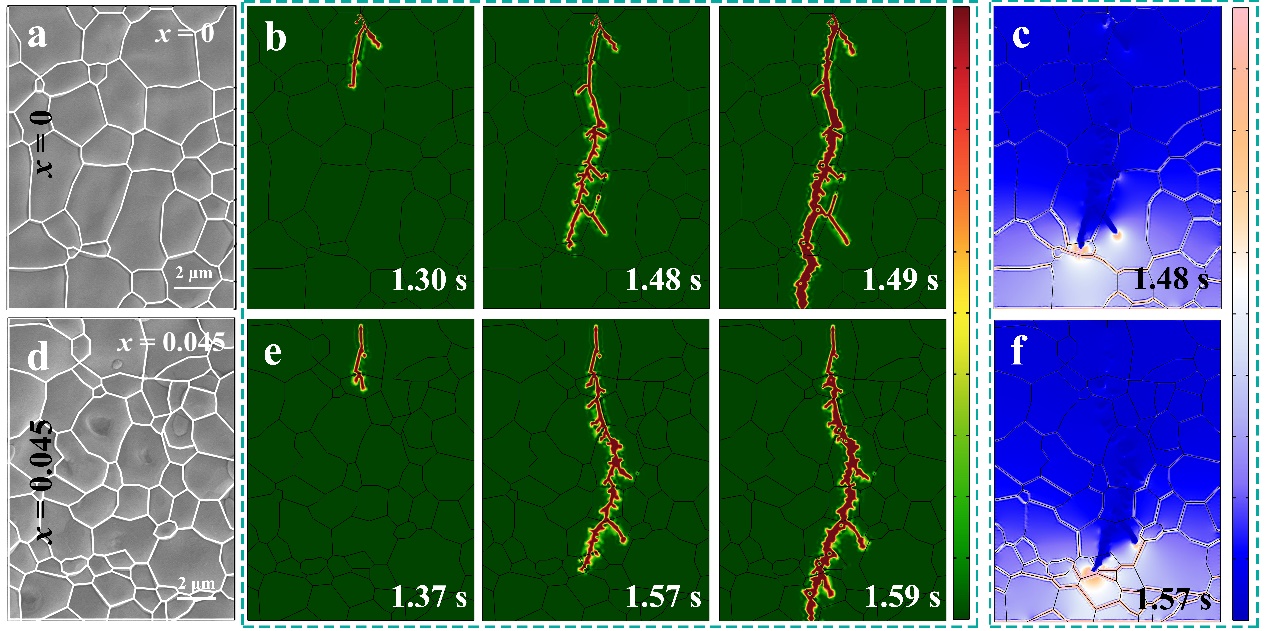


**Supplementary Fig. 7 Breakdown simulation of ZS0 and ZS45 ceramics.** SEM images used for extracting two-dimensional models **a** ZS0 and **d** ZS45. Phase-field simulation of an electrical tree evolution for **b** ZS0 and **e** ZS45. Electric field distribution for **c** ZS0 and **f** ZS45 ceramics.





**Supplementary Fig. 8 Dielectric performance of PL(ZS)*x*T ceramics.** Dielectric constant and tan*δ* as a function of temperature for **a** ZS0, **b** ZS15, **c** ZS30, **d** ZS35 and **e** ZS40 ceramics.


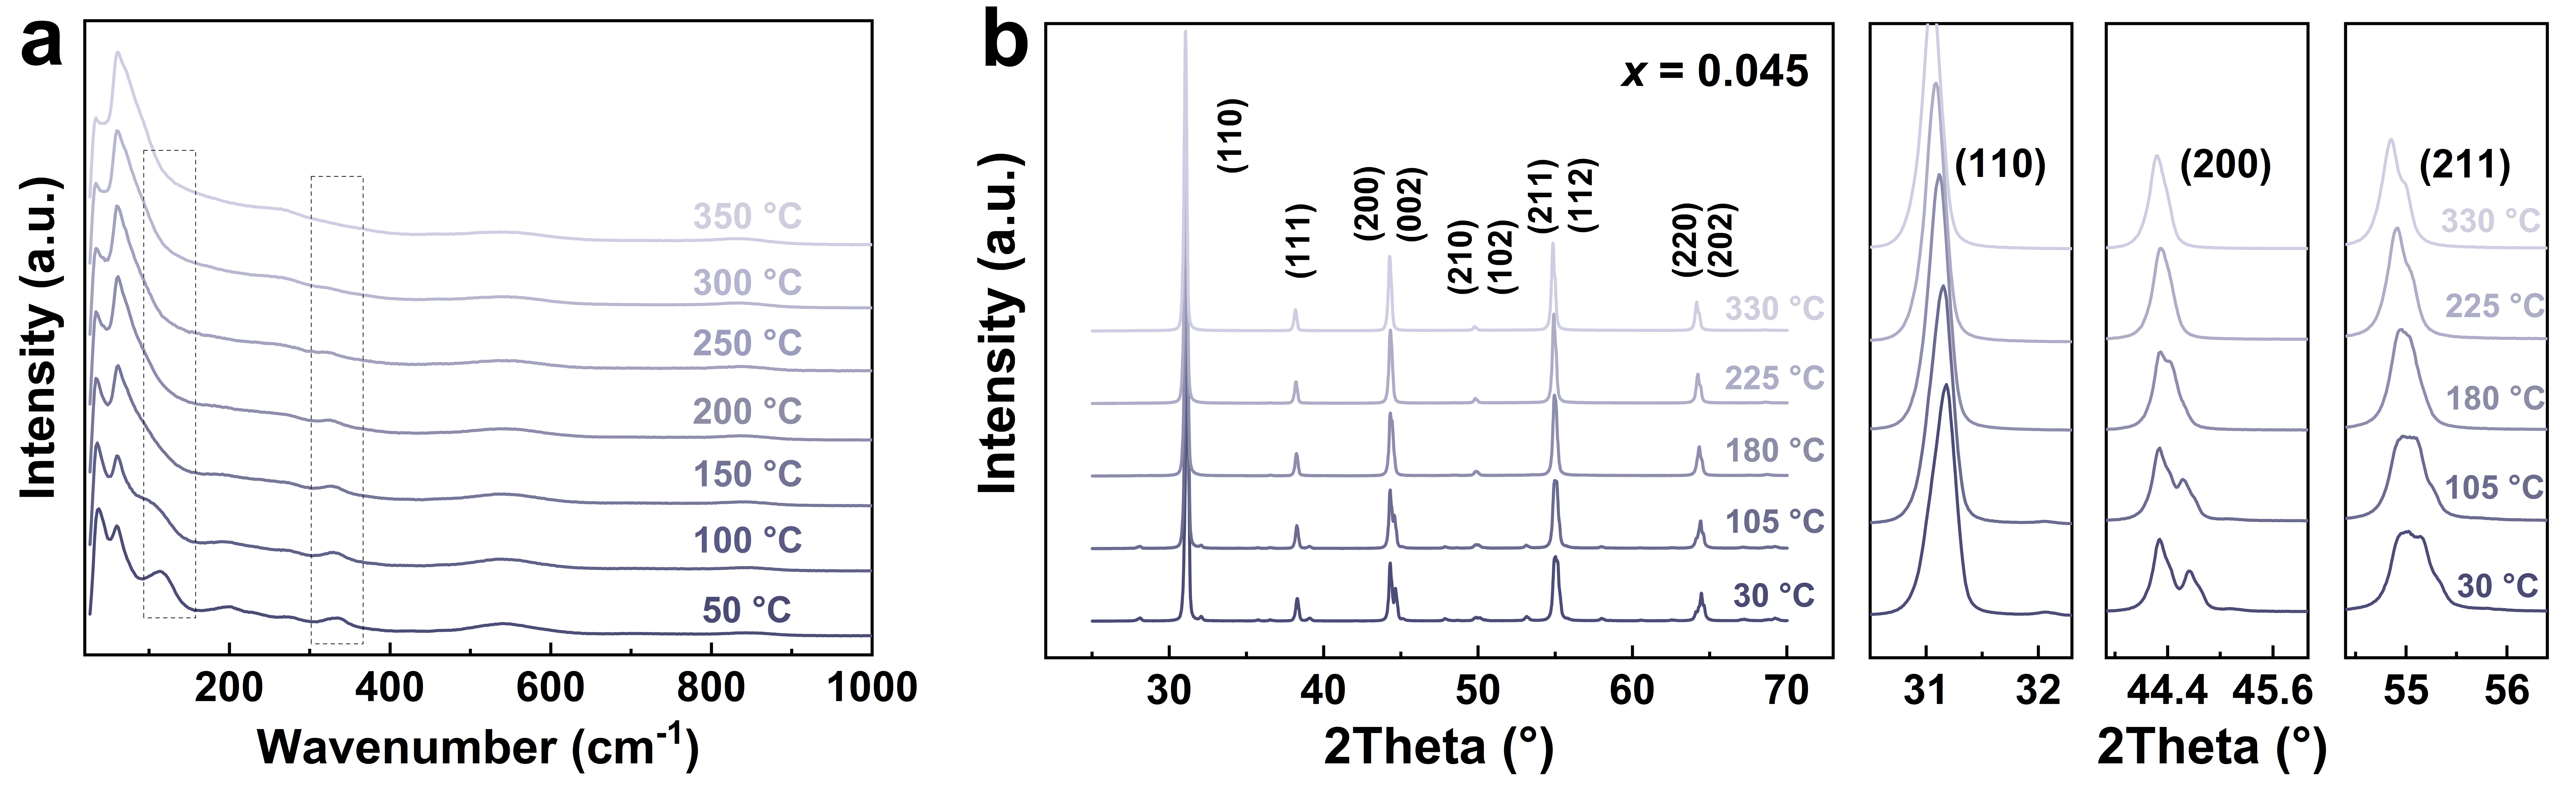


**Supplementary Fig. 9 *In situ* XRD and Raman spectra testing of ZS45 ceramic. a** XRD pattern and **b** Raman spectrawith temperature variation.

**Supplementary Table 1**

| **Figure** | **Reference** |
| --- | --- |
| Fig. 1f | 1-34 |
| Fig. 1i | 1-3,5-9,11,14,17,22,23,26,27,30,32 |

**Supplementary Table 2**

| **Sample** | **Phase** | **Element** | **x** | **y** | **z** | **fraction** | **Uiso** |
| --- | --- | --- | --- | --- | --- | --- | --- |
| ZS0 | O | Pb(1)+2 | 0.722879 | 0.129297 | 0 | 0.98 | 0.03853 |
| Pb(2)+2 | 0.741365 | 0.12166 | 0.5 | 0.98 | 0.0188 |
| La(1)+3 | 0.722879 | 0.129297 | 0 | 0.02 | 0.06353 |
| La(2)+3 | 0.741365 | 0.12166 | 0.5 | 0.02 | 0.04738 |
| Zr+4 | 0.229892 | 0.120982 | 0.251543 | 0.6 | 0 |
| Sn+4 | 0.24916 | 0.127508 | 0.243941 | 0.4 | 0 |
| O(1)-2 | 0.299537 | 0.15864 | 0 | 1 | 0.00216 |
| O(2)-2 | 0.185222 | 0.14248 | 0.5 | 1 | 0.00216 |
| O(3)-2 | 0.08075 | 0.14832 | 0.231165 | 1 | 0.00216 |
| O(4)-2 | 0 | 0.5 | 0.247393 | 1 | 0.00216 |
| O(5)-2 | 0 | 0 | 0.186477 | 1 | 0.00216 |
| ZS45 | O | Pb(1)+2 | 0.719388 | 0.126508 | 0 | 0.98 | 0.02605 |
| Pb(2)+2 | 0.722549 | 0.125088 | 0.5 | 0.98 | 0.01791 |
| La(1)+3 | 0.719388 | 0.126508 | 0 | 0.02 | 0.05105 |
| La(2)+3 | 0.722549 | 0.125088 | 0.5 | 0.02 | 0.04291 |
| Zr+4 | 0.243628 | 0.125581 | 0.249048 | 0.6 | 0 |
| Sn+4 | 0.235454 | 0.123091 | 0.247689 | 0.4 | 0 |
| O(1)-2 | 0.295181 | 0.064838 | 0 | 1 | 0.0015 |
| O(2)-2 | 0.249219 | 0.131597 | 0.5 | 1 | 0.0015 |
| O(3)-2 | 0.059482 | 0.260808 | 0.218031 | 1 | 0.0015 |
| O(4)-2 | 0 | 0.5 | 0.204647 | 1 | 0.0015 |
| O(5)-2 | 0 | 0 | 0.216281 | 1 | 0.0015 |

| **Sample** | ***R*wp (%)** | ***R*P**  **(%)** | **Phase** | **Space**  **group** | **a[Å]** | **b[Å]** | **c[Å]** |
| --- | --- | --- | --- | --- | --- | --- | --- |
| ZS0 | 2.76 | 1.97 | O | *Pbam* | 5.817626 | 11.634752 | 8.213701 |
| ZS45 | 2.83 | 1.98 | O | *Pbam* | 5.829927 | 11.659741 | 8.217455 |

**Supplementary References**

1 Guo, J. *et al.* Achieving Excellent Energy Storage Properties in Fine‐Grain High‐Entropy Relaxor Ferroelectric Ceramics. *Advanced Electronic Materials* **8** (2022).

2 Hu, J. *et al.* Achieving exceptional energy storage performance in PbHfO3 antiferroelectric ceramics through defect engineering design. *Mater Horiz* (2025).

3 Liu, X., Yang, T. & Gong, W. Achieving ultrahigh energy-storage capability in PbZrO3-based antiferroelectric capacitors based on optimization of property parameters. *Journal of Materials Chemistry A* **10**, 4137-4145 (2022).

4 Yan, F. *et al.* Boosting Energy Storage Performance of Lead-Free Ceramics via Layered Structure Optimization Strategy. *Small* **18**, e2202575 (2022).

5 Yan, F. *et al.* Composition and Structure Optimized BiFeO3 -SrTiO3 Lead-Free Ceramics with Ultrahigh Energy Storage Performance. *Small* **18**, e2106515 (2022).

6 Jiang, S. *et al.* Delayed phase switching field and improved capacitive energy storage in Ca2+-modified (Pb,La)(Zr,Sn)O3 antiferroelectric ceramics. *Scripta Materialia* **235**, 115602 (2023).

7 Zhou, Y. *et al.* Design of antiferroelectric polarization configuration for ultrahigh capacitive energy storage via increasing entropy. *Nat Commun* **16** (2025).

8 Li, C. J., Yao, M. W. & Yao, X. An effective strategy for enhancing energy storage density in (Pb1-1.5*x*Gd*x*)(Zr0.87Sn0.12Ti0.01)O3 antiferroelectric ceramics. *Journal of Materials Chemistry A* **11**, 18689-18701 (2023).

9 Zhou, J. *et al.* Excellent energy storage performance of lead-based antiferroelectric ceramics via enhancing dielectric breakdown mechanism. *Chem Eng J* **487**, 150476 (2024).

10 Chai, Q. *et al.* Excellent energy storage properties in lead-free ferroelectric ceramics via heterogeneous structure design. *Nat Commun* **16**, 1633 (2025).

11 Yang, J. *et al.* Field-induced strain engineering to optimize antiferroelectric ceramics in breakdown strength and energy storage performance. *Acta Materialia* **257**, 119186 (2023).

12 Yan, F. *et al.* Gradient-Structured Ceramics with High Energy Storage Performance and Excellent Stability. *Small* **19**, e2206125 (2023).

13 Kong, X. *et al.* High-entropy engineered BaTiO3-based ceramic capacitors with greatly enhanced high-temperature energy storage performance. *Nat Commun* **16**, 885 (2025).

14 Li, D. *et al.* A high-temperature performing and near-zero energy loss lead-free ceramic capacitor. *Energ Environ Sci* **16**, 4511-4521 (2023).

15 Li, J., Li, F., Xu, Z. & Zhang, S. Multilayer Lead-Free Ceramic Capacitors with Ultrahigh Energy Density and Efficiency. *Adv Mater* **30**, e1802155 (2018).

16 Yan, F. *et al.* Optimization of polarization and electric field of bismuth ferrite-based ceramics for capacitor applications. *Chem Eng J* **417** (2021).

17 Li, C., Yao, M., Yang, T. & Yao, X. Optimizing energy storage performance of lead zirconate-based antiferroelectric ceramics by a phase modulation strategy. *Chem Eng J* **497**, 154913 (2024).

18 Ge, G. *et al.* Optimizing the energy storage properties of antiferroelectric ceramics by modulating the phase structure via constructing a novel binary composite. *Journal of Materials Chemistry A* **9**, 11291-11299 (2021).

19 Yan, F. *et al.* Realizing superior energy storage properties in lead-free ceramics via a macro-structure design strategy. *Journal of Materials Chemistry A* **8**, 11656-11664 (2020).

20 Yan, F. *et al.* Sandwich structured lead-free ceramics based on Bi0.5Na0.5TiO3 for high energy storage. *Chem Eng J* **425** (2021).

21 Yan, F. *et al.* Significantly enhanced energy storage density and efficiency of BNT-based perovskite ceramics via A-site defect engineering. *Energy Storage Mater* **30**, 392-400 (2020).

22 Wu, S. Y. *et al.* Superb Energy Storage Capability for NaNbO3-Based Ceramics Featuring Labyrinthine Submicro-Domains with Clustered Lattice Distortions. *Small* **19**, 2303915 (2023).

23 Li, S. *et al.* Superior energy storage and discharge performance achieved in PbHfO3-based antiferroelectric ceramics. *Journal of Applied Physics* **135** (2024).

24 Yan, F. *et al.* Superior energy storage properties and excellent stability achieved in environment-friendly ferroelectrics via composition design strategy. *Nano Energy* **75** (2020).

25 Ge, G. L. *et al.* Synergistic optimization of antiferroelectric ceramics with superior energy storage properties via phase structure engineering. *Energy Storage Mater* **35**, 114-121 (2021).

26 Liu, J. *et al.* A synergistic two-step optimization design enables high capacitive energy storage in lead-free Sr0.7Bi0.2TiO3-based relaxor ferroelectric ceramics. *Journal of Materials Chemistry A* **11**, 609-620 (2023).

27 Yan, F. *et al.* Tape‐Casting Lead‐Free Dielectrics Permit Superior Capacitive Energy Storage Performance. *Advanced Energy Materials* **15** (2024).

28 Ge, G. *et al.* Tunable Domain Switching Features of Incommensurate Antiferroelectric Ceramics Realizing Excellent Energy Storage Properties. *Advanced Materials* **34**, 2201333 (2022).

29 Liu, X., Zhao, Y., Sun, N., Li, Y. & Hao, X. Ultra-high energy density induced by diversified enhancement effects in (Pb0.98−*x*La0.02Ca*x*)(Zr0.7Sn0.3)0.995O3 antiferroelectric multilayer ceramic capacitors. *Chem Eng J* **417**, 128032 (2021).

30 Yan, F. *et al.* Ultrahigh Energy Storage Density and Efficiency of Lead-Free Dielectrics with Sandwich Structure. *Small* **20**, e2306803 (2024).

31 Zhang, M. *et al.* Ultrahigh energy storage in high-entropy ceramic capacitors with polymorphic relaxor phase. *Science* **384**, 185-189 (2024).

32 Liu, X., Li, Y. & Hao, X. Ultra-high energy-storage density and fast discharge speed of (Pb0.98−*x*La0.02Sr*x*)(Zr0.9Sn0.1)0.995O3 antiferroelectric ceramics prepared via the tape-casting method. *Journal of Materials Chemistry A* **7**, 11858-11866 (2019).

33 Wang, H., Liu, Y., Yang, T. & Zhang, S. Ultrahigh Energy‐Storage Density in Antiferroelectric Ceramics with Field‐Induced Multiphase Transitions. *Adv Funct Mater* **29**, 1807321 (2019).

34 Zhang, L. *et al.* Ultra‐Weak Polarization‐Strain Coupling Effect Boosts Capacitive Energy Storage. *Advanced Materials* **36**, 2406219 (2024).
